## EFFECTS OF TAURINE ON $\text{Ca}^{2+}$ -DEPENDENT FORCE DEVELOPMENT OF SKINNED MUSCLE FIBRE PREPARATIONS

BY S. GALLER\*, C. HUTZLER†

*Fakultät für Biologie, Universität Konstanz, D-7750 Konstanz,  
Federal Republic of Germany*

AND T. HALLER

*Institut für Zoologie, Technikerstraße 25, Universität Innsbruck,  
A-6020 Innsbruck, Austria*

*Accepted 22 May 1990*

### Summary

The effects of the naturally occurring amino acid taurine (2-aminoethanesulphonic acid) on isometric force development were investigated using skinned muscle fibre preparations. In atrial and ventricular pig heart muscles, as well as in fibres of slow abdominal extensor muscle of crayfish, an increase of submaximal isometric force was observed in  $\text{Ca}^{2+}$ -activated skinned fibre preparations at physiological concentrations of taurine. The maximal isometric force remained unaffected in all preparations. It is assumed that taurine increases the  $\text{Ca}^{2+}$  sensitivity of the force-generating myofilaments in mammalian hearts and crustacean slow skeletal muscle fibres.

### Introduction

Taurine occurs widely in animal tissues, often at concentrations exceeding those of most other free amino acids (Jacobsen and Smith, 1968). The highest concentrations have been detected in excitable tissues such as nerve and muscle (Huxtable, 1980), and a variety of physiological effects have been reported. The most established function is its contribution to osmoregulation in the muscle tissues of many marine animals, especially crustaceans (Shaw, 1958; Allen and Garrett, 1971; Dalla Via, 1989).

Taurine is also present in considerable amounts in heart tissues, constituting up to 50 % of the free amino acid pool in mammals (Awapara *et al.* 1950). Here, too, taurine has been proposed to maintain cardiac osmolarity (Thurston *et al.* 1981).

\* Present address: Zoologisches Institut der Universität Salzburg, Hellbrunnerstraße 34, A-5020 Salzburg, Austria.

† Present address: Abteilung für Physiologie der Universität Ulm, Oberer Eselsberg, D-7900, FRG.

Key words: taurine,  $\text{Ca}^{2+}$  sensitizer, heart, crayfish muscle, skinned fibre.

In addition, taurine modulates numerous  $\text{Ca}^{2+}$ -dependent processes in heart and other tissues (Chovan *et al.* 1980; Kramer *et al.* 1981; Huxtable, 1989; Dolara *et al.* 1973). Taurine influences cardiac contractility, inducing antiarrhythmic activity (Read and Welty, 1963) and exerting positive (in low- $\text{Ca}^{2+}$  media) as well as negative (in high- $\text{Ca}^{2+}$  media) inotropic effects on intact mammalian hearts (Dietrich and Diacono, 1971; Schaffer *et al.* 1978; Franconi *et al.* 1982). Furthermore, the positive inotropic effects of cardiac glycosides are potentiated by taurine (Guidotti *et al.* 1971).

Direct effects of taurine on force generation of the isolated contractile machinery have not yet been reported. We measured the isometric force production of  $\text{Ca}^{2+}$ -activated skinned muscle fibre preparations (see Stephenson, 1981) of pig heart and slow skeletal muscles of crayfish in the presence and absence of physiological concentrations of taurine. Some of our results have been published in abstract form (Galler and Hutzler, 1988).

### Materials and methods

#### *Biological materials and skinning procedures*

Pig hearts were obtained from the local slaughterhouse. Crayfish (*Pacifastacus leniusculus*, Dana) originated from the University of Konstanz. Tissue concentrations of taurine were determined using a slightly modified HPLC technique described earlier (Haller and Lackner, 1987). For mechanical experiments, fibre bundles of pig heart muscle (trabeculae of the right atrium and musculi papillares in the right ventricle) were chemically skinned in a solution containing 50% glycerol, 1% Triton X-100, 2 mmol l<sup>-1</sup> dithioerythritol (DTE), 10 mmol l<sup>-1</sup> NaN<sub>3</sub>, 5 mmol l<sup>-1</sup> ATP, 5 mmol l<sup>-1</sup> MgCl<sub>2</sub>, 5 mmol l<sup>-1</sup> EGTA and 20 mmol l<sup>-1</sup> imidazole, pH 7.0 adjusted with KOH. Since preliminary mechanical experiments suggested that there are intracellular  $\text{Ca}^{2+}$ -sequestering vesicles, we extended the skinning procedure to 24 h at a temperature of about 4°C. Such treated preparations did not show any  $\text{Ca}^{2+}$ -translocating activity, but the velocity of force development was generally reduced. Maximum isometric tension was also diminished (about 1.5 N cm<sup>-2</sup>). We have chosen these preparations to exclude any possible effects of  $\text{Ca}^{2+}$  translocation due to the activity of sarcoplasmic reticulum.

Skinned skeletal muscle fibres of crayfish were prepared by drying abdominal muscles (using silica gel, at -20°C) that had been frozen quickly in liquid nitrogen (see Stienen *et al.* 1983). For mechanical measurements, single fibres of superficial abdominal extensor muscles (Parnas and Atwood, 1966) were used.

For heart muscle preparations, the relaxation solution contained Mopso [3-(*N*-morpholino)-2-hydroxypropanesulphonic acid] (20 mmol l<sup>-1</sup>), K<sub>2</sub>H<sub>2</sub>EGTA (10 mmol l<sup>-1</sup>), Na<sub>2</sub>H<sub>2</sub>ATP (10 mmol l<sup>-1</sup>), sodium phosphocreatine (10 mmol l<sup>-1</sup>), magnesium propionate (13.4 mmol l<sup>-1</sup>) and taurine (0 or 5 mmol l<sup>-1</sup>). The maximal activating solution had the same composition, except that K<sub>2</sub>H<sub>2</sub>EGTA was substituted by CaH<sub>2</sub>EGTA (10 mmol l<sup>-1</sup>) and the magnesium propionate

concentration was  $12.9 \text{ mmol l}^{-1}$ . The ionic strength of the solutions was  $0.11 \text{ mol l}^{-1}$ . For the crayfish slow muscle preparation, relaxation and maximal activating solutions (ionic strength,  $0.22 \text{ mol l}^{-1}$ ; solutions modified after Moisescu and Thieleczek, 1979) both contained Mopso ( $60 \text{ mmol l}^{-1}$ ),  $\text{Na}_2\text{H}_2\text{ATP}$  ( $8 \text{ mmol l}^{-1}$ ), sodium phosphocreatine ( $10 \text{ mmol l}^{-1}$ ), caffeine ( $15 \text{ mmol l}^{-1}$ ) and taurine (0 or  $5 \text{ mmol l}^{-1}$ ). In addition, the relaxation solution contained  $\text{K}_2\text{H}_2\text{EGTA}$  ( $50 \text{ mmol l}^{-1}$ ) and magnesium propionate ( $8.3 \text{ mmol l}^{-1}$ ) and the maximal activating solution contained  $\text{CaH}_2\text{EGTA}$  ( $50 \text{ mmol l}^{-1}$ ) and magnesium propionate ( $7.4 \text{ mmol l}^{-1}$ ). In all cases, pH was adjusted to 6.70 at a temperature of  $22 \pm 0.5^\circ\text{C}$ .

In preliminary experiments, different ion compositions of the bath solutions were tested to obtain optimal conditions for reproducible force values of the skinned muscle fibre preparations. A relatively low pH of 6.70 appeared most appropriate. In addition, the adjustment of the required free  $\text{Ca}^{2+}$  concentrations in the EGTA-buffered solutions is facilitated at this relatively low pH. For crayfish fast skeletal muscle fibre preparations no condition could be detected in which force transitions were reproducible enough to study effects on myofibrillar  $\text{Ca}^{2+}$  sensitivity. Thus, taurine effects could not be investigated in crayfish fast muscle fibres.

To obtain solutions with different  $\text{Ca}^{2+}$  concentrations, relaxing and maximal activating solutions were mixed in different ratios. Creatine kinase ( $50 \text{ i.u. ml}^{-1}$ ) was added to all solutions immediately before the mechanical experiments. Precise concentrations of free calcium and magnesium ions in all bath solutions were achieved with an iterative computer program based on the equilibrium constants listed by Martell and Smith (1977). The free magnesium ion concentration in the bath solutions was  $1 \text{ mmol l}^{-1}$  in the case of crayfish skeletal muscle fibres and  $3 \text{ mmol l}^{-1}$  in the case of the pig heart preparations. Free  $\text{Ca}^{2+}$  concentrations of the activating solutions with and without taurine were measured with a  $\text{Ca}^{2+}$ -selective electrode (Schefer *et al.* 1986) calibrated with the solutions described by Tsien and Rink (1980) (ionic strength,  $0.13 \text{ mol l}^{-1}$ ). Differences, due to different ionic strengths, of the activity coefficients of  $\text{Ca}^{2+}$  in the calibration and experimental solutions were corrected by applying the Debye Hückel formalism as described by Meier *et al.* (1980).

#### *Isometric force measurements*

The skinned fibres were mounted horizontally between a fixed glass needle and a force transducer (AE 801, SensoNor, Horton, Norway) with nitrocellulose dissolved in acetone. The preparations were 0.5–2 mm long with diameters of 70–200  $\mu\text{m}$ . After mounting, the fibres were immediately incubated in the relaxing solution. To improve the pattern of cross-striation, length changes of about 1 % of total fibre length were induced for about 5 min by moving the glass needle sinusoidally with a vibrator (Ling V 101). Sarcomere length of the muscle fibres was measured with a laser beam (He–Ne laser from Spectra physics, model 102; 4 mW) according to the method described by Zite-Ferenczi and Rüdél (1978).

Sarcomere length of the heart preparations was set at  $2.1\ \mu\text{m}$ ; that of crayfish slow skeletal muscle fibres was not changed after incubating the stiff dried fibres mounted at the apparatus for force measurements. It ranged from 7 to  $10\ \mu\text{m}$ .

The skinned fibre preparations were activated by incubation in solutions with different  $\text{Ca}^{2+}$  concentrations. An automatic cuvette transporting system provided a rapid change of bath solutions. Force signals were measured with a bridge amplifier connected to a chart recorder (Gould, Brush 220).

## Results

### *Taurine concentrations in muscle tissues*

Concentrations of taurine in different tissues and animals are listed in Table 1. The amount of taurine in atrial muscles of pig is smaller than in ventricular muscles ( $P < 0.05$ ). In crayfish, slow abdominal extensor muscles contain up to seven times more taurine than do fast abdominal extensor muscles. The ratio varies considerably in different animals.

### *Maximal isometric force*

Maximal activating solutions with or without taurine were applied with or without intermittent relaxation to test the effects of taurine on maximum isometric force development. Up to concentrations of  $20\ \text{mmol l}^{-1}$ , no significant influence of taurine on maximum isometric force could be detected.

### *Submaximal isometric forces*

Successive activations of crayfish slow skeletal muscle fibres by addition of  $\text{Ca}^{2+}$  were interrupted by total relaxation, whereas in pig heart preparations,  $\text{Ca}^{2+}$  concentration was raised gradually without intermittent relaxations. Activating solutions with and without taurine were applied alternately (Fig. 1).

In several experiments, the preparations were preincubated in a taurine-containing relaxation solution for different times (0–30 min) prior to the submaximal activations in the presence of taurine. In other experiments, crayfish slow muscle preparations were incubated continuously in taurine-containing media, but at the end of the experiments submaximal activations were applied in taurine-free

Table 1. *Taurine concentrations of different animal tissues*

| Species  | Tissue                     | Taurine content<br>[ $\mu\text{mol g}^{-1}$ wet mass] | <i>N</i> | $\pm$ s.d. |
|----------|----------------------------|-------------------------------------------------------|----------|------------|
| Pig      | Right atrium*              | 3.79                                                  | 4        | 0.25       |
|          | Right ventricle†           | 4.47                                                  | 4        | 0.43       |
| Crayfish | Abdominal extensor muscles |                                                       |          |            |
|          | Fast muscle                | 2.49                                                  | 5        | 0.52       |
|          | Slow muscle                | 16.1                                                  | 5        | 3.75       |

\* Trabeculae, † M. papillares.

media. Here, preincubation in taurine-free relaxation solution lasted 1 min. In all these cases of different incubation procedures, similar taurine effects were observed.

In most of the experiments on crayfish slow muscle, preparations were kept in taurine-free media for about 15 min during the first incubations in relaxation and activation solutions. Pig heart preparations were kept in taurine-free media for more than 24 h during the skinning procedure and the first mechanical experiments. When changing from taurine-free to taurine-containing media or *vice versa*, preincubations lasting from about 20 s (crayfish preparations) to 2 min (pig heart preparations) in the corresponding relaxation solutions were applied.

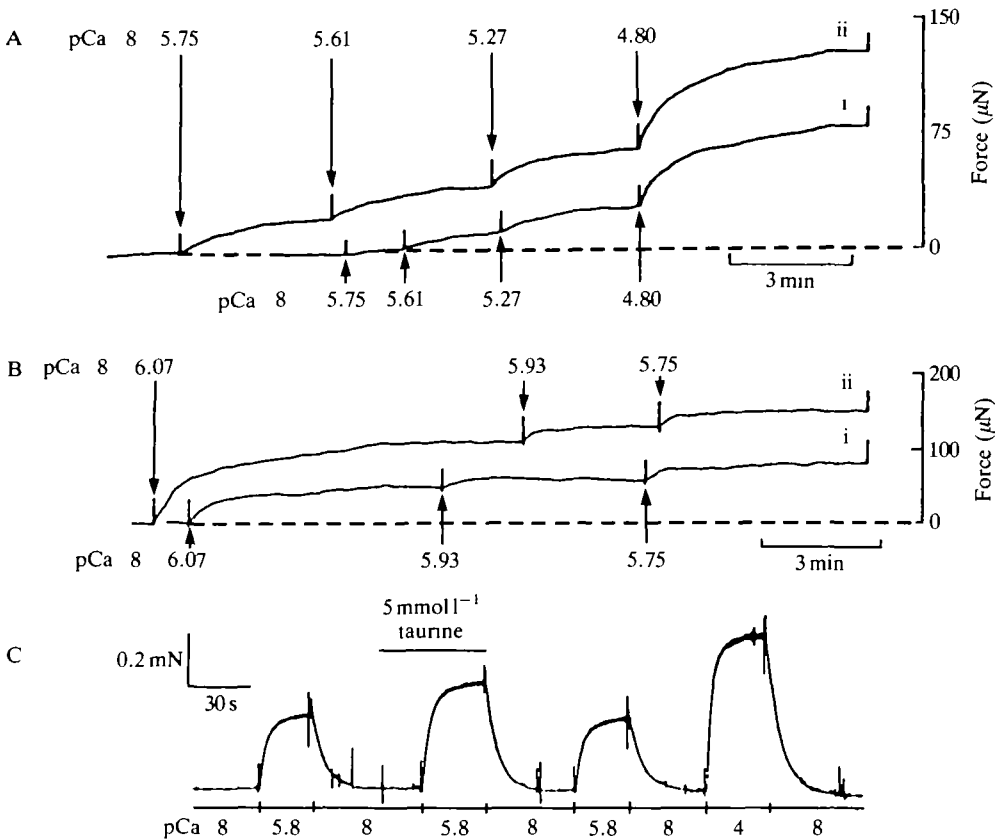

Fig. 1. Examples of mechanical experiments with an atrial (A) and a ventricular (B) skinned fibre preparation of pig heart and a slow skeletal muscle fibre of crayfish (C). Ai and Bi demonstrate increases of force after stepwise increase of  $\text{Ca}^{2+}$  concentration (expressed as  $\text{pCa} = -\log[\text{Ca}^{2+}]$ ) in the absence of taurine. After maximal activation and relaxation at  $\text{pCa} 8$  (not shown) the same stepwise  $\text{Ca}^{2+}$  increases were repeated in the presence of  $5 \text{ mmol l}^{-1}$  taurine (Aii, Bii). (C) A slow skeletal muscle fibre of crayfish is activated submaximally at  $\text{pCa} 5.8$  in solutions with and without  $5 \text{ mmol l}^{-1}$  taurine. Single activations here are alternated with relaxations at  $\text{pCa} 8$ . Maximum isometric force is reached on the last activation at  $\text{pCa} 4.03$ .

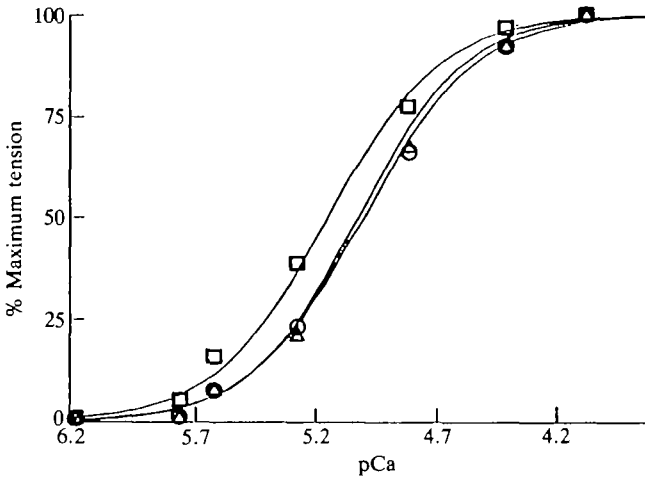

Fig. 2. Force values of a pig atrial muscle preparation relative to its maximal force are plotted against pCa. Curve-fitting resulted from the linear regression of a Hill plot. The shift of the  $pCa_{50}$  (pCa for half-maximal activation) towards lower  $Ca^{2+}$  concentration induced by  $5 \text{ mmol l}^{-1}$  taurine ( $\square$ ) is  $0.14 \text{ pCa}$  units. One control curve ( $\circ$ ) represents  $Ca^{2+}$ -dependent force measurements before the addition of taurine, the other ( $\triangle$ ) indicates the experiment after the removal of taurine.

Submaximal forces were enhanced by taurine in both cardiac and crayfish slow muscles. At about half-maximal activation the observed increase was  $15.2 \pm 9.7\%$  (s.d.) of maximal force in atrial preparations ( $N=8$ ),  $17.9 \pm 13.0\%$  (s.d.) in ventricular preparations ( $N=10$ ), and  $13.2 \pm 6.5\%$  (s.d.) in crayfish slow skeletal muscle fibres ( $N=12$ ) in the presence of  $5 \text{ mmol l}^{-1}$  taurine. Relative force plotted against pCa of the activating solutions and fitted with a Hill equation (Altringham and Johnston, 1982) revealed a shift of the curve towards lower  $Ca^{2+}$  values in the presence of taurine (Fig. 2). The increase of  $pCa_{50}$  (the negative logarithm of  $Ca^{2+}$  concentration for half-maximal activation) is significant (paired  $t$ -test,  $P < 0.001$ ) and similar for different preparations: pig atrial fibres,  $0.13 \pm 0.09 \text{ pCa}$  units ( $\pm$ s.d.,  $N=7$ ); pig ventricular fibres,  $0.15 \pm 0.11 \text{ pCa}$  units ( $N=10$ ); crayfish slow muscle fibres,  $0.10 \pm 0.04 \text{ pCa}$  units ( $N=12$ ). Taurine did not significantly change the slope of the pCa–force curve in any preparation.

### Discussion

Our measurements of taurine concentrations in different muscle tissues correspond with the findings in skeletal muscles of chicken (Airaksinen and Partanen, 1985) and fish (Haller and Lackner, 1987), where higher concentrations were found in the slow muscles than in the fast muscles. The higher taurine levels in pig ventricular muscles compared to those in atrial muscles also fit the above pattern, since ventricular muscle is considered to be slow and atrial muscle to be fast (Morano *et al.* 1988).

Physiological concentrations of taurine in pig heart and crayfish slow skeletal muscle fibres shift the pCa-force curve to lower  $\text{Ca}^{2+}$  concentrations without affecting the maximal force. These findings cannot be explained by a change of  $\text{Ca}^{2+}$  activity within the muscle fibre preparations as a result of  $\text{Ca}^{2+}$  movement through the sarcoplasmic reticulum. Pig heart preparations were treated with the non-ionic detergent Triton X-100, which removes membranes of sarcoplasmic reticulum (Meisheri and Rüegg, 1983). In the case of crayfish slow skeletal muscle fibres, all solutions for mechanical experiments contained  $15 \text{ mmol l}^{-1}$  caffeine, which prevents accumulation of  $\text{Ca}^{2+}$  in the sarcoplasmic reticulum (Nagasaki and Kasai, 1983). In addition, a constant  $\text{Ca}^{2+}$  level was maintained using high concentrations of the  $\text{Ca}^{2+}$  buffer EGTA ( $50 \text{ mmol l}^{-1}$ ). The possibility, therefore, that taurine acts *via* a change of  $\text{Ca}^{2+}$  concentration mediated through the sarcoplasmic reticulum can be excluded. We assume instead that taurine increases the  $\text{Ca}^{2+}$  sensitivity of the force-generating structures in pig heart and crayfish slow skeletal muscles.

As to the mechanism of action of taurine, its dipolar character may be responsible for the effects mentioned above, since taurine weakens charge-dependent protein-protein interactions. The troponin-I-actin binding which inhibits the force-generating myosin-actin interaction (El-Saleh *et al.* 1986) could theoretically be weakened by taurine. This would lead to the observed calcium-sensitizing effect (Rüegg, 1987).

The positive inotropic effect of taurine on living mammalian hearts (e.g. Dietrich and Diacono, 1971; Dolara *et al.* 1973) is usually thought to be caused by an increase in intracellular  $\text{Ca}^{2+}$  concentration mediated by taurine. Franconi *et al.* (1982) measured the force and tissue  $\text{Ca}^{2+}$  concentrations of superfused guinea pig ventricular strips at different external  $\text{CaCl}_2$  concentrations in the presence and absence of taurine. They found only a coarse positive correlation between the taurine-mediated change in contractility and the taurine-induced change in the  $\text{Ca}^{2+}$  concentration of the heart tissue at different external  $\text{CaCl}_2$  concentrations. The maxima of the two parameters appeared at different external  $\text{CaCl}_2$  concentrations. The maximal taurine-mediated increase of internal  $\text{Ca}^{2+}$  concentration occurred at an external  $\text{CaCl}_2$  concentration of  $1.8 \text{ mmol l}^{-1}$ , whereas the maximal taurine-induced positive inotropic effect appeared at an external  $\text{CaCl}_2$  concentration of  $0.9 \text{ mmol l}^{-1}$ . Thus, in the presence of taurine, the increase of force is not always strictly correlated with an increase of internal  $\text{Ca}^{2+}$  concentration. Therefore, the positive inotropic effect of taurine may not be an exclusive effect of increased intracellular  $\text{Ca}^{2+}$  in intact heart muscle fibres; our study suggests that it may be partially due to enhanced  $\text{Ca}^{2+}$  sensitivity of force-generating myofilaments.

The potentiation of the positive inotropic effect of cardiac glycosides on intact mammalian hearts by taurine (Guidotti *et al.* 1971) may also be explained by the  $\text{Ca}^{2+}$ -sensitizing action. For these reasons, further attention should be paid to taurine as a potential moderate cardiotoxic drug.

Since changes in taurine concentration appear in mammalian hearts and in

crustacean skeletal muscles in different physiological states, the  $\text{Ca}^{2+}$ -sensitizing effect of taurine could have physiologically important implications. Congestive heart failure in humans (Huxtable and Bressler, 1974) and dogs (Peterson *et al.* 1973) is accompanied by an increased taurine concentration in the heart tissues affected. Probably taurine is increased because of its  $\text{Ca}^{2+}$ -sensitizing effects on myofibrils.

In some crustacean species (e.g. *Carcinus*, *Eriocheir* and *Palaemon*; see Shaw, 1958; Allen and Garrett, 1971; Dalla Via, 1989) changes in sarcoplasmic taurine concentration were found to be dependent on extracellular osmolarity. Implications for muscle contraction are still unknown.

Apart from the naturally occurring sarcoplasmic imidazoles carnosine and *N*-acetyl histidine (Harrison *et al.* 1986), no endogenous  $\text{Ca}^{2+}$  sensitizers have yet been found. Non-endogenous  $\text{Ca}^{2+}$ -sensitizing drugs (submazole, Herzig *et al.* 1981; caffeine, Wendt and Stephenson, 1983) are imidazole derivatives. With taurine, a  $\text{Ca}^{2+}$  sensitizer with different chemical properties has been found. It is possible that other sarcoplasmic amino acids and peptides (e.g. glutamine and glutathione) may also have modulatory effects on the  $\text{Ca}^{2+}$  sensitivity of myofibrils.

This work is dedicated to Professor Dr W. Wieser (Institut für Zoologie, Universität Innsbruck) on the occasion of his 65<sup>th</sup> birthday. The authors wish to thank Professor J. C. Rüegg (Heidelberg) and his group for a gentle introduction into the skinned fibre technique and their encouragement. Our thanks are also due to Professor W. Rathmayer (Konstanz) for generous and helpful support, Professor W. Wieser (Innsbruck) for reading the manuscript and D. Günzel and S. Lanka (Konstanz) for valuable assistance and support. J. Vogt, W. Kühnel and S. Hahn (Konstanz) are acknowledged for constructing our mechanical apparatus and Drs D. Ammann and T. Bühler (Zürich) for providing some  $\text{Ca}^{2+}$ -selective membranes. This work was supported by the DFG (SFB 156) and by the FWF (P-7162/BIO).

### References

- AIRAKSINEN, E. M. AND PARTANEN, J. (1985). Muscle taurine in chicken and diseased human muscle. In *Taurine: Biological Actions and Clinical Perspectives* (ed. S. S. Oja, L. Ahtee, P. Kontro and M. K. Paasonen), pp. 407–412. New York: Alan R. Liss, Inc.
- ALLEN, J. A. AND GARRETT, M. R. (1971). Taurine in marine invertebrates. *Adv. mar. Biol.* **9**, 205–253.
- ALTRINGHAM, J. D. AND JOHNSTON, I. A. (1982). The pCa-tension and force-velocity characteristics of skinned fibres isolated from fish fast and slow muscles. *J. Physiol., Lond.* **333**, 159–176.
- AWAPARA, J., LANDUA, A. AND FUERST, R. (1950). Distribution of free amino acids and related substances in the organs of the rat. *Biochim. biophys. Acta* **5**, 457–462.
- CHOVAN, J. P., KULAKOWSKY, E. C., SHEAKOWSKI, S. AND SCHAFFER, S. W. (1980). Calcium regulation by the low-affinity taurine binding sites of cardiac sarcolemma. *Molec. Pharmacol.* **17**, 295–300.
- DALLA VIA, G. J. (1989). The effect of salinity on free amino acids in the prawn *Palaemon elegans* (Rathke). *Arch. Hydrobiol.* **115**, 125–135.



- DIETRICH, J. AND DIACONO, J. (1971). Comparison between ouabain and taurine effects on isolated rat and guinea-pig hearts in low calcium medium. *Life Sci.* **10**, 499–507.
- DOLARA, P., AGRESTI, A., GIOTTI, A. AND PASQUINI, G. (1973). Effect of taurine on calcium kinetics of guinea-pig heart. *Eur. J. Pharmac.* **24**, 352–358.
- EL-SALEH, S. C., WARBER, K. D. AND POTTER, J. D. (1986). The role of tropomyosin-troponin in the regulation of skeletal muscle contraction. *J. Muscle Res. Cell Motil.* **7**, 387–404.
- FRANCONI, F., MARTINI, P., STENARDI, J., MATUCCI, R., ZILLETI, L. AND GIOTTI, A. (1982). Effect of taurine on calcium levels and contractility in guinea-pig ventricular strips. *Biochem. Pharmac.* **31**, 3181–3185.
- GALLER, S. AND HUTZLER, C. (1988). Effects of free amino acids on tension generation by crustacean skinned muscle fibres. *Pflügers Arch.* **412**, R82.
- GUIDOTTI, A., BADIANI, G. AND GIOTTI, A. (1971). Potentiation by taurine of inotropic effect of strophanthine-K on guinea-pig isolated auricles. *Pharmac. Res. Commun.* **3**, 29–38.
- HALLER, T. AND LACKNER, R. (1987). Screening for organic acids in fish tissues with special reference to the distribution of taurine in *Rutilus rutilus*. L. *Fish Physiol. Biochem.* **3**, 145–149.
- HARRISON, S. M., LAMONT, C. AND MILLER, D. J. (1986). Carnosine and other natural imidazoles enhance muscle  $\text{Ca}^{2+}$  sensitivity and are mimicked by caffeine and ARL-115 BS. *J. Physiol., Lond.* **371**, 197P.
- HERZIG, J. W., FEILE, K. AND RÜEGG, J. C. (1981). Activating effects of AR-L 115 BS on the  $\text{Ca}^{2+}$  sensitive force, stiffness and unloaded shortening velocity ( $V_{\max}$ ) in isolated contractile structures from mammalian heart muscle. *Arzneim.-Forsch./Drug. Res.* **31**, 188–191.
- HUXTABLE, R. J. (1980). Does taurine have a function? *Fedn. Proc. Fedn. Am. Socs. exp. Biol.* **39**, 2678–2679.
- HUXTABLE, R. J. (1989). Taurine in the central nervous system and the mammalian actions of taurine. *Prog. Neurobiol.* **32**, 471–533.
- HUXTABLE, R. J. AND BRESSLER, R. (1974). Taurine concentration in congestive heart failure. *Science* **184**, 1187–1188.
- JACOBSEN, J. G. AND SMITH, L. H. (1968). Biochemistry and physiology of taurine and taurine derivatives. *Physiol. Rev.* **48**, 424–511.
- KRAMER, J. H., CHOVAN, J. P. AND SCHAFFER, S. W. (1981). Effect of taurine on calcium paradox and ischemic heart failure. *Am. J. Physiol.* **240**, H238–H246.
- MARTELL, A. E. AND SMITH, R. M. (1977). *Critical Stability Constants*. New York, London: Plenum Press.
- MEIER, P. C., AMMANN, D., MORF, W. E. AND SIMON, W. (1980). Liquid-membrane ion-selective electrodes and their biomedical applications. In *Medical and Biological Applications of Electrochemical Devices* (ed. J. Koryta), pp. 13–91. Chichester, New York, Brisbane, Toronto: Wiley, J. & Sons.
- MEISHERI, K. D. AND RÜEGG, J. C. (1983). Dependence of cyclic-AMP induced relaxation on  $\text{Ca}^{2+}$  and calmodulin in skinned smooth muscle of guinea pig *taenia coli*. *Pflügers Arch.* **399**, 315–320.
- MOISESCU, D. G. AND THIELECZEK, R. (1979). Calcium and strontium concentration changes within skinned muscle preparations following a change in the external bathing solution. *J. Physiol., Lond.* **275**, 241–262.
- MORANO, I., ARNDT, H., GÄRTNER, C. AND RÜEGG, J. C. (1988). Skinned fibres of human atrium and ventricle: Myosin isoenzymes and contractility. *Circulation Res.* **62**, 632–639.
- NAGASAKI, K. AND KASAI, M. (1983). Fast release of calcium from sarcoplasmic reticulum vesicles monitored by chlortetracycline fluorescence. *J. Biochem.* **94**, 1101–1109.
- PARNAS, I. AND ATWOOD, H. L. (1966). Phasic and tonic neuromuscular systems in the abdominal extensor muscles of the crayfish and rock lobster. *Comp. Biochem. Physiol.* **18**, 701–723.
- PETERSON, M. B., MEAD, R. J. AND WELTY, J. D. (1973). Free amino acids in congestive heart failure. *J. molec. cell. Cardiol.* **5**, 139–147.
- READ, W. O. AND WELTY, J. D. (1963). Effect of taurine on epinephrine and digoxin induced irregularities of dog heart. *J. Pharmac. exp. Ther.* **139**, 283–289.
- RÜEGG, J. C. (1987). Calcium-Regulation der Muskelkontraktion. Die molekularen Regulationsmechanismen der Kontraktilität. *Naturwissenschaften* **74**, 579–584.

- SCHAFFER, S. W., CHOVAN, J. P. AND WERKMAN, R. F. (1978). Dissociation of cAMP changes and myocardial contractility in taurine perfused rat heart. *Biochem. biophys. Res. Commun.* **81**, 248–253.
- SCHEFER, U., AMMANN, D., PRETSCH, E., OESCH, U. AND SIMON, W. (1986). Neutral carrier based  $\text{Ca}^{2+}$ -selective electrode with detection limit in the sub-nanomolar range. *Analyt. Chem.* **58**, 2282–2285.
- SHAW, J. (1958). Osmoregulation in the muscle fibres of *Carcinus maenas*. *J. exp. Zool.* **35**, 920–929.
- STEPHENSON, E. W. (1981). Activation of fast skeletal muscle: contributions of studies on skinned fibers. *Am. J. Physiol.* **240** (*Cell Physiol.* **9**), C1–C19.
- STIENEN, G. J. M., GÜTH, K. AND RÜEGG, J. C. (1983). Force and force transients in skeletal muscle fibres of the frog skinned by freeze-drying. *Pflügers Arch.* **397**, 272–276.
- THURSTON, J. H., HAUHART, R. E. AND NACCARATO, E. F. (1981). Taurine: Possible role in osmotic regulation of mammalian heart. *Science* **214**, 1373–1374.
- TSIEN, R. Y. AND RINK, T. J. (1980). Neutral carrier ion-selective microelectrodes for measurement of intracellular free calcium. *Biochim. biophys. Acta* **599**, 623–638.
- WENDT, I. R. AND STEPHENSON, D. G. (1983). Effects of caffeine on  $\text{Ca}^{2+}$  activated force production in skinned cardiac and skeletal muscle fibres of the rat. *Pflügers Arch.* **398**, 210–216.
- ZITE-FERENCZI, F. AND RÜDEL, R. (1978). A diffractometer using a lateral effect photodiode for the rapid determination of sarcomere length changes in cross-striated muscle. *Pflügers Arch.* **374**, 97–100.
